# Supplementary material
Source: Springer Nature journal article supplement (https://www.springermedizin.de/resource/supplementary/13046_2008_105_MOESM3_ESM.pdf/9661636)

**Immunological reactivity of patient B:  
Interferon- $\gamma$  secreting T-lymphocytes in PBMC**

**Before trAb therapy**

**Day 39 after restimulation**

**Day 110 after restimulation**

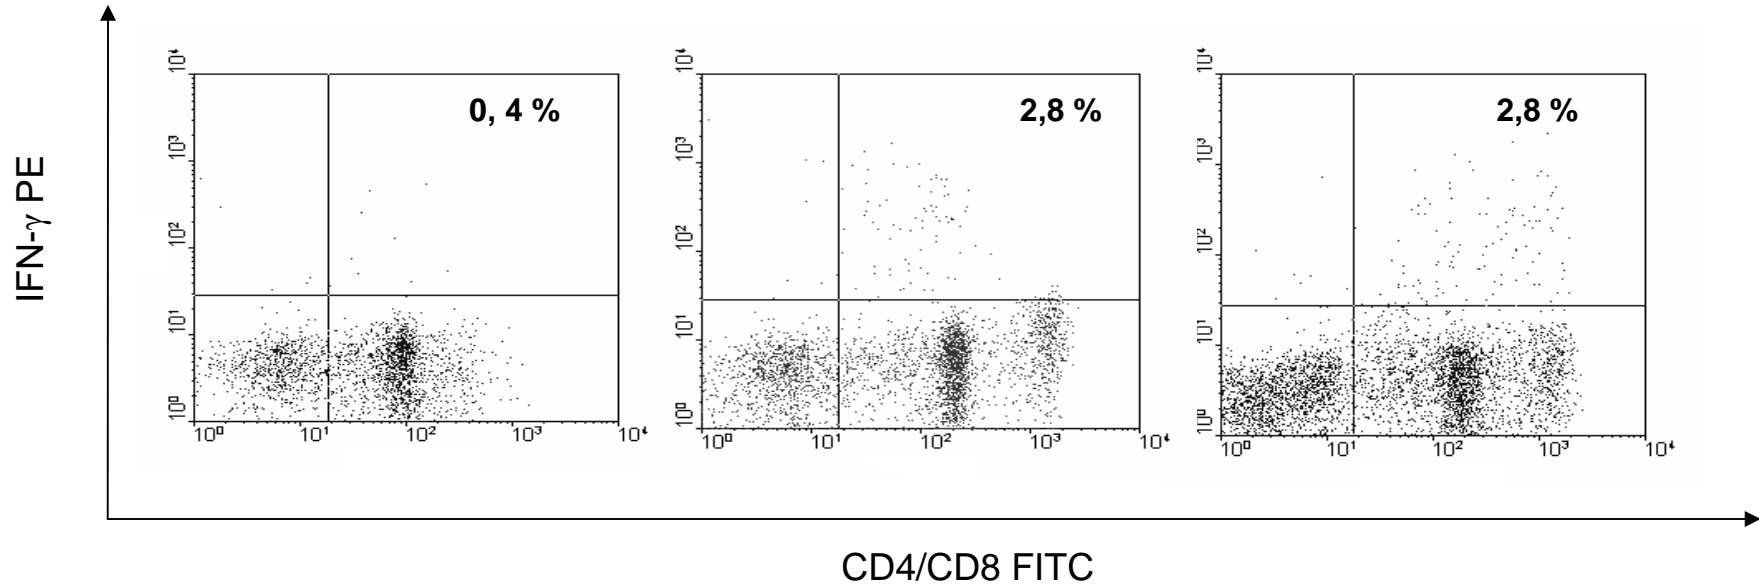

Supplement: MOESM3 [file 9661636]
